# Supplementary material
Source: PubMed Central journal article supplement (PMC9017714)
Supplement: NIHMS1745671-supplement-Supplementary_material.pdf [file NIHMS1745671-supplement-Supplementary_material.pdf]

## **Detection of serotonin, melatonin and their metabolites in honey**

Tae-Kang Kim<sup>1,2</sup>, Venkatram R. Atigadda<sup>1</sup>, Pawel Brzeminski<sup>1,4</sup>, Adrian Fabisiak<sup>1,4</sup>, Edith K. Y. Tang<sup>3</sup>, Robert C. Tuckey<sup>3</sup>, Russel J. Reiter<sup>5</sup>, Andrzej T. Slominski<sup>1,2\*</sup>

<sup>1</sup>Department of Dermatology, University of Alabama at Birmingham, <sup>2</sup>VA Medical Center, Birmingham, AL 35294, USA, <sup>3</sup>School of Molecular Sciences, The University of Western Australia, Perth, WA 6009, Australia, <sup>4</sup>Department of Chemistry, University of Warsaw, Pasteura 1, 02-093 Warsaw, Poland, <sup>5</sup>Department of Cellular and Structural Biology, UT Health Science Center, San Antonio, TX, USA

\*Corresponding author:

Andrzej T. Slominski, MD, PhD, Department of Dermatology, University of Alabama at Birmingham, Birmingham, AL 35294. USA; e-mail: [aslominski@uabmc.edu](mailto:aslominski@uabmc.edu); phone: 205.934.5245

Supplementary Materials

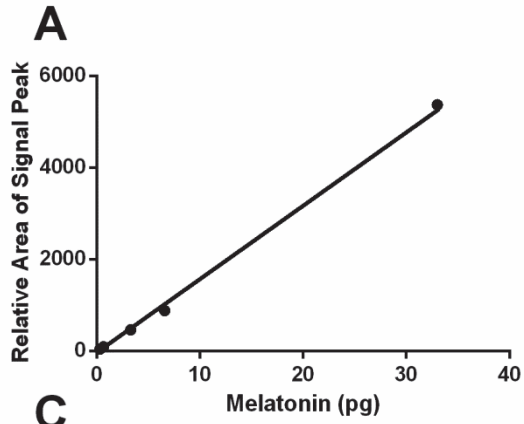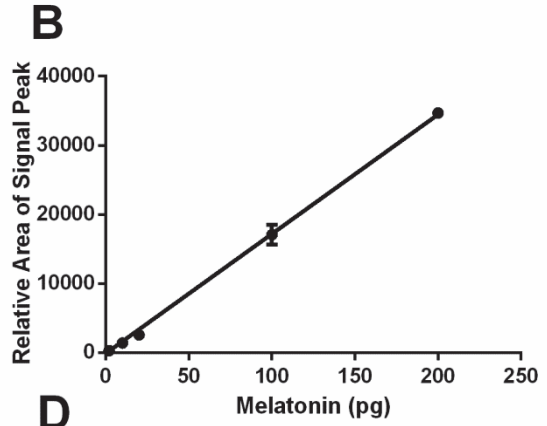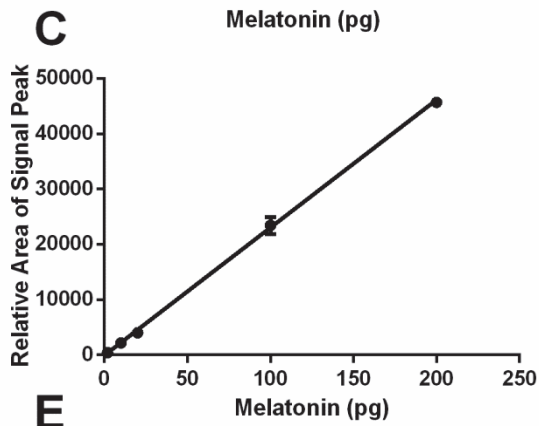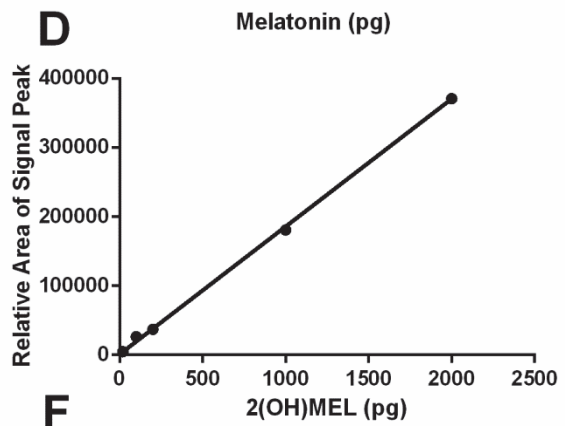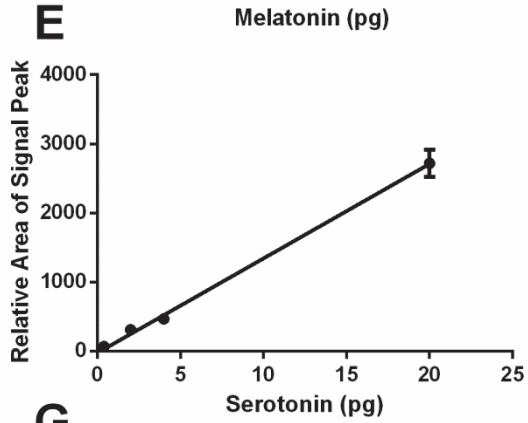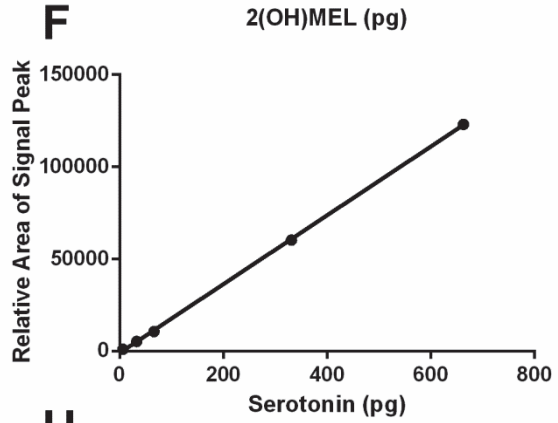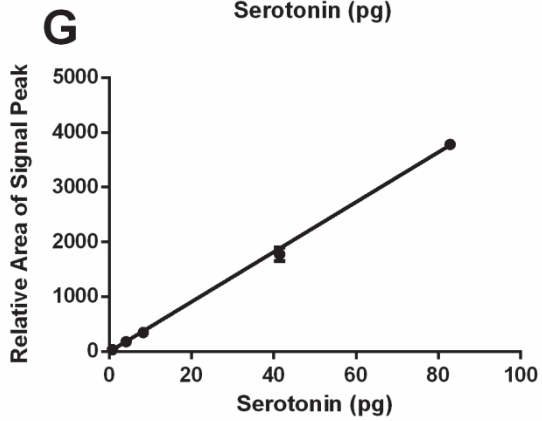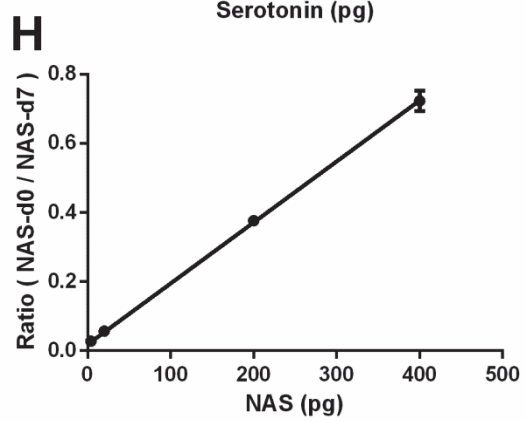

Figure S1. Standard curves for melatonin and its derivatives used for quantification. The peak area was calculated using Waters MassLynx™ Software with EIC of A, Melatonin,  $m/z = 174.1$   $[M+H-NH_2CH_3CO]^+$ ; B, Melatonin,  $m/z = 233.1$   $[M+H]^+$ ; C, Melatonin,  $m/z = 255.1$   $[M+Na]^+$ ; D, 2(OH)MEL,  $m/z = 249.1$   $[M+H]^+$ ; E, Serotonin for commercial honey sample 1,  $m/z = 160.1$   $[M+H-NH_3]^+$ ; F, Serotonin for Australian honey and Polish commercial honey,  $m/z = 160.1$   $[M+H-NH_3]^+$ ; G, Serotonin for commercial honey sample 2 and Polish natural honey,  $m/z = 160.1$   $[M+H-NH_3]^+$ ; H, NAS,  $m/z = 160.1$   $[M+H-NH_2CH_3CO]^+$  and NAS-d7,  $m/z = 164.1$   $[M+H-NH_2CH_3CO]^+$

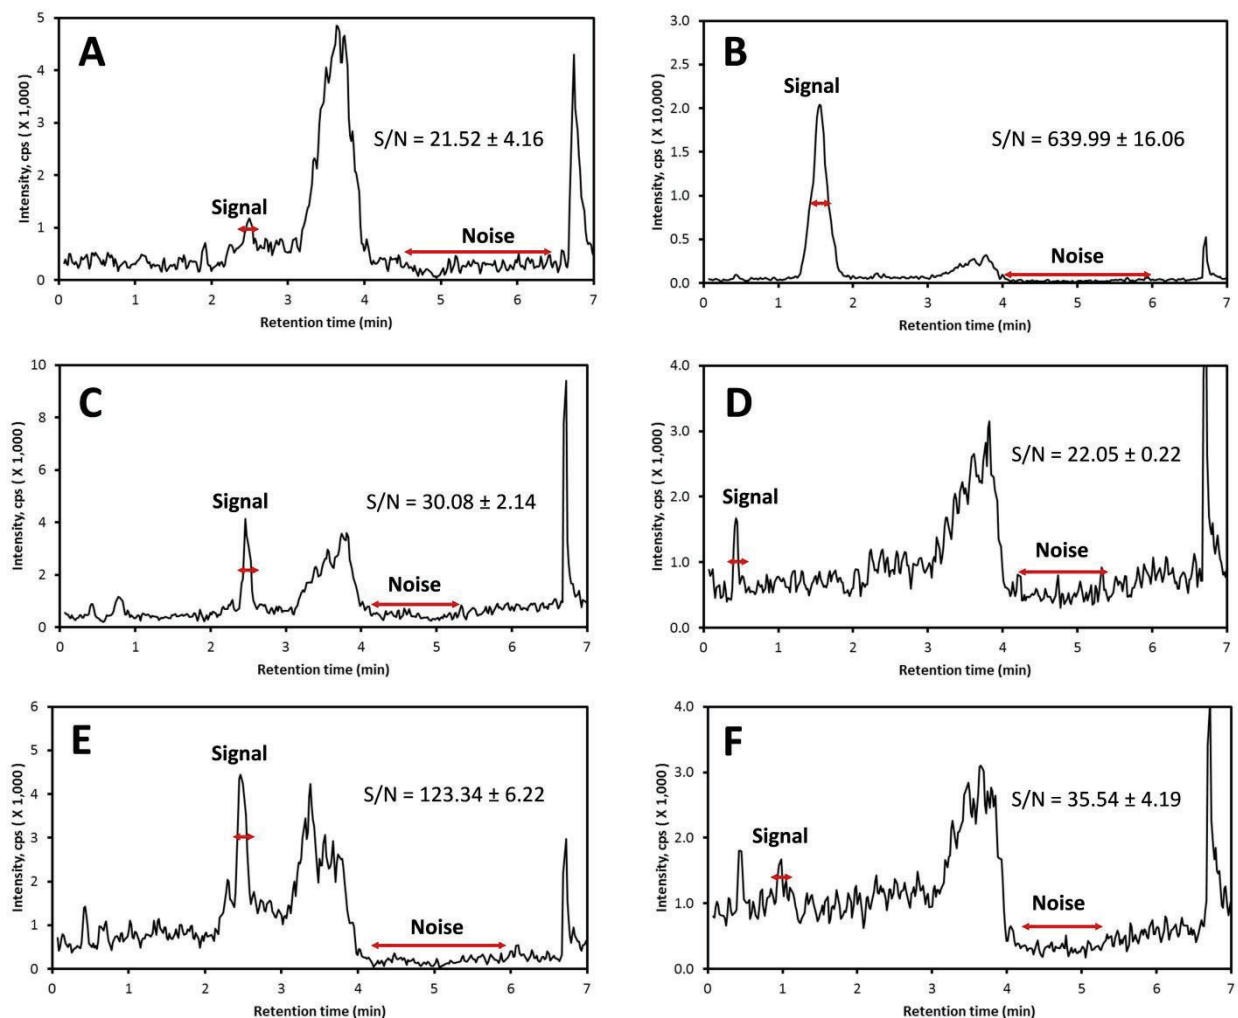

Figure S2. The limits of quantification (LOQ) were determined by calculating the ratio of signal/noise (S/N) using Waters MassLynx™ Software with EIC of A, 0.33 pg Melatonin,  $m/z = 174.1$   $[M+H-NH_2CH_3CO]^+$ ; B,

20 pg 2(OH)MEL,  $m/z = 249.1 [M+H]^+$ ; C, 2 pg Melatonin,  $m/z = 233.1 [M+H]^+$ ; D, 0.4 pg Serotonin,  $m/z = 160.1 [M+H-NH_3]^+$ ; E, 2 pg Melatonin,  $m/z = 255.1 [M+Na]^+$ ; F, 0.4 pg NAS,  $m/z = 160.1 [M+H-NH_2CH_3CO]^+$ .

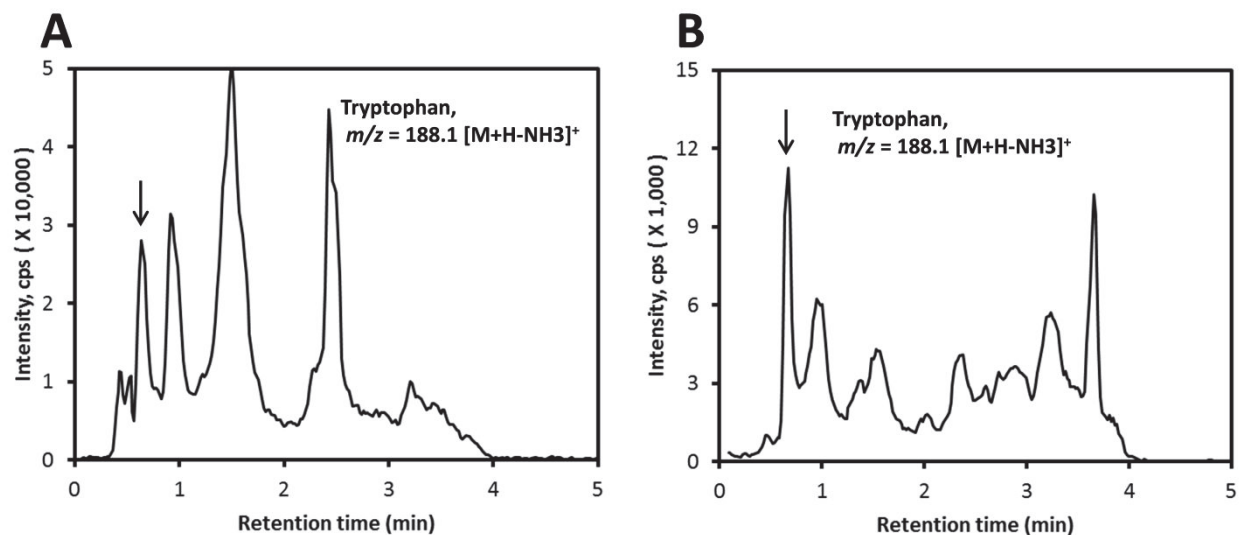

Figure S3. Detection of tryptophan in honey. A, Tryptophan in Australian honey; B, Tryptophan in commercial honey sample 1.

Table S1. Recoveries of standard melatonin by methylene chloride and ethyl acetate extraction procedures. Melatonin was added to water:honey mixture and samples were extracted with methylene chloride or ethyl acetate as described in the Methods, then analyzed by LC-MS.

| Samples                       | Recovery (%)                     |                                   |                                                                     |
|-------------------------------|----------------------------------|-----------------------------------|---------------------------------------------------------------------|
|                               | $m/z = 233.1$ [M+H] <sup>+</sup> | $m/z = 255.1$ [M+Na] <sup>+</sup> | $m/z = 174.1$ [M+H-NH <sub>2</sub> CH <sub>3</sub> CO] <sup>+</sup> |
| Melatonin Standard            | 100                              | 100                               | 100                                                                 |
| Methylene chloride extraction | 77.17 ± 9.24                     | 74.71 ± 0.68                      | 87.10 ± 6.56                                                        |
| Ethyl acetate extraction      | 58.38 ± 4.21                     | 62.34 ± 0.74                      | 66.26 ± 4.07                                                        |

Table S2. Recoveries of standard serotonin by methylene chloride and ethyl acetate extraction procedures. Serotonin was added to water:honey mixture and samples were extracted with methylene chloride or ethyl acetate as describes in the Methods, then analyzed by LC-MS.

| Samples                       | Recovery (%)<br>$m/z = 160.1$ [M+H-NH <sub>3</sub> ] <sup>+</sup> |
|-------------------------------|-------------------------------------------------------------------|
| Serotonin Standard            | 100                                                               |
| Methylene chloride extraction | 15.20 ± 0.31                                                      |
| Ethyl acetate extraction      | 133.69 ± 3.72                                                     |

Table S3. Recoveries of standard NAS by methylene chloride and ethyl acetate extraction procedures. Serotonin was added to water:honey mixture and samples were extracted with methylene chloride or ethyl acetate as describes in the Methods, then analyzed by LC-MS.

| Samples                       | Recovery (%)<br>$m/z = 160.1$ [M+H-NH <sub>2</sub> CH <sub>3</sub> CO] <sup>+</sup> |
|-------------------------------|-------------------------------------------------------------------------------------|
| NAS Standard                  | 100                                                                                 |
| Methylene Chloride extraction | 17.95 ± 0.49                                                                        |
| Ethyl Acetate extraction      | 82.05 ± 5.02                                                                        |
